# Supplementary material for: Evaluation of spice and herb as phyto-derived selective modulators of human retinaldehyde dehydrogenases using a simple in vitro method
Source: Oxford University Press journal article supplement (doi:10.1042/bsr20210491), 2021-05-01
Supplement: bsr-2021-0491_supp.pdf [file bsr-2021-0491_supp.pdf]

## Supplementary Material

### Evaluation of spice and herb as phyto-derived selective modulators for human retinaldehyde dehydrogenases using a simple *in vitro* method

Thi Bao Chau Bui<sup>a,b,c</sup>, Shohei Nosaki<sup>a,d</sup>, Mito Kokawa<sup>d</sup>, Yuqun Xu<sup>a</sup>, Yutaka Kitamura<sup>d</sup>, Masaru Tanokura<sup>a,b,\*</sup>, Satoshi Hachimura<sup>a,b,\*</sup>, Takuya Miyakawa<sup>a,\*</sup>

<sup>a</sup> *Department of Applied Biological Chemistry, Graduate School of Agricultural and Life Sciences, The University of Tokyo, Tokyo 113-8657, Japan*

<sup>b</sup> *Research Center for Food Safety, Graduate School of Agricultural and Life Sciences, The University of Tokyo, Bunkyo-ku, Tokyo 113-8657, Japan*

<sup>c</sup> *Graduate School of Science and Technology, University of Tsukuba, 1-1-1 Tennodai, Tsukuba, Ibaraki 305-8572, Japan*

<sup>d</sup> *Faculty of Life and Environmental Sciences, University of Tsukuba, 1-1-1 Tennodai, Tsukuba, Ibaraki 305-8572, Japan*

\* Corresponding authors.

*E-mail address:* amtanok@mail.ecc.u-tokyo.ac.jp (M. Tanokura), ahachi@g.ecc.u-tokyo.ac.jp (S. Hachimura), atmiya@mail.ecc.u-tokyo.ac.jp (T. Miyakawa).

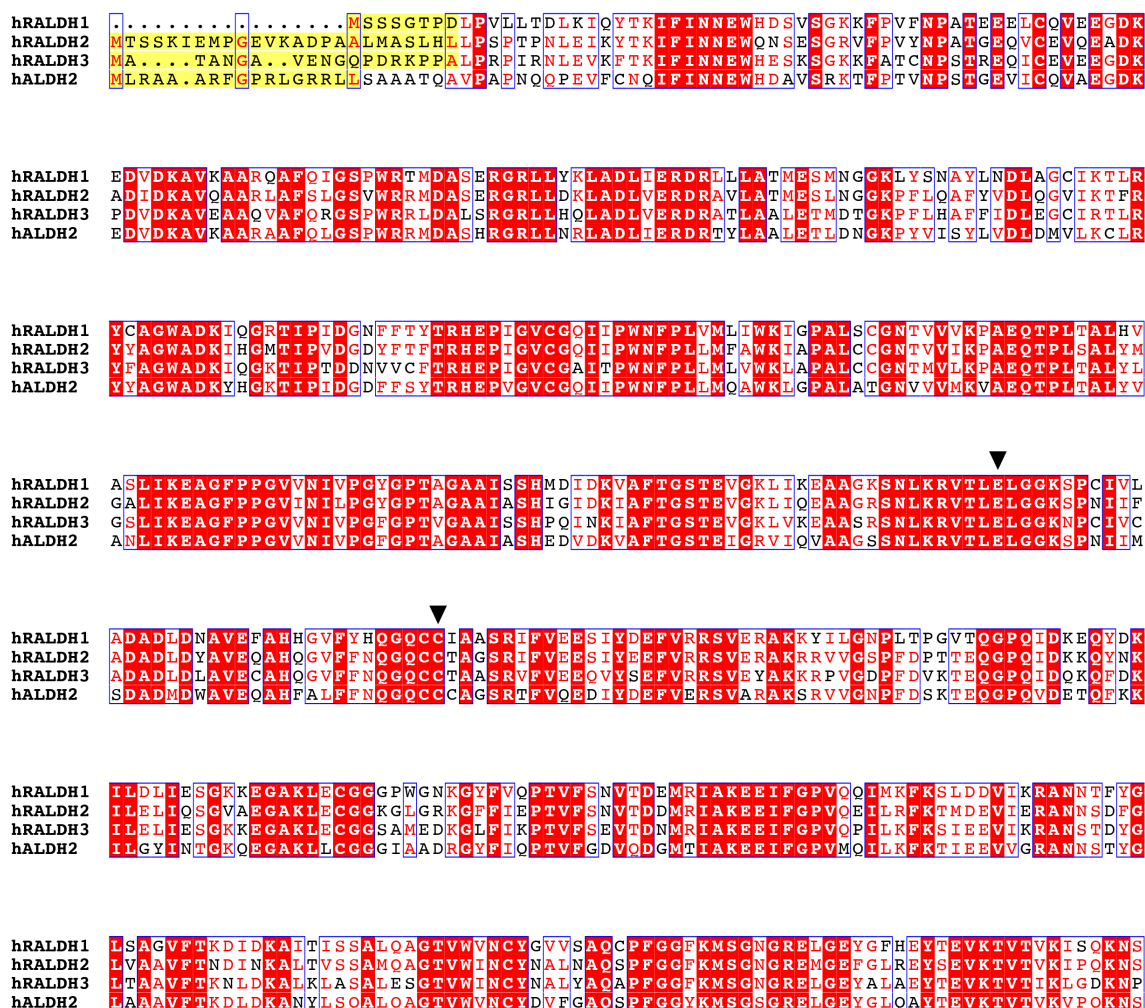

**Figure S1. Multiple sequence alignment of human RALDHs and ALDH2.** Identical residues are shaded red, and homologous residues are shown as red letters. Alignment of sequences were performed by CLUSTAL W and displayed by ESPrpt 3.0. Arrowheads indicate conserved catalytic residues Cys and Glu. Yellow highlights indicate N-terminus deleted regions.

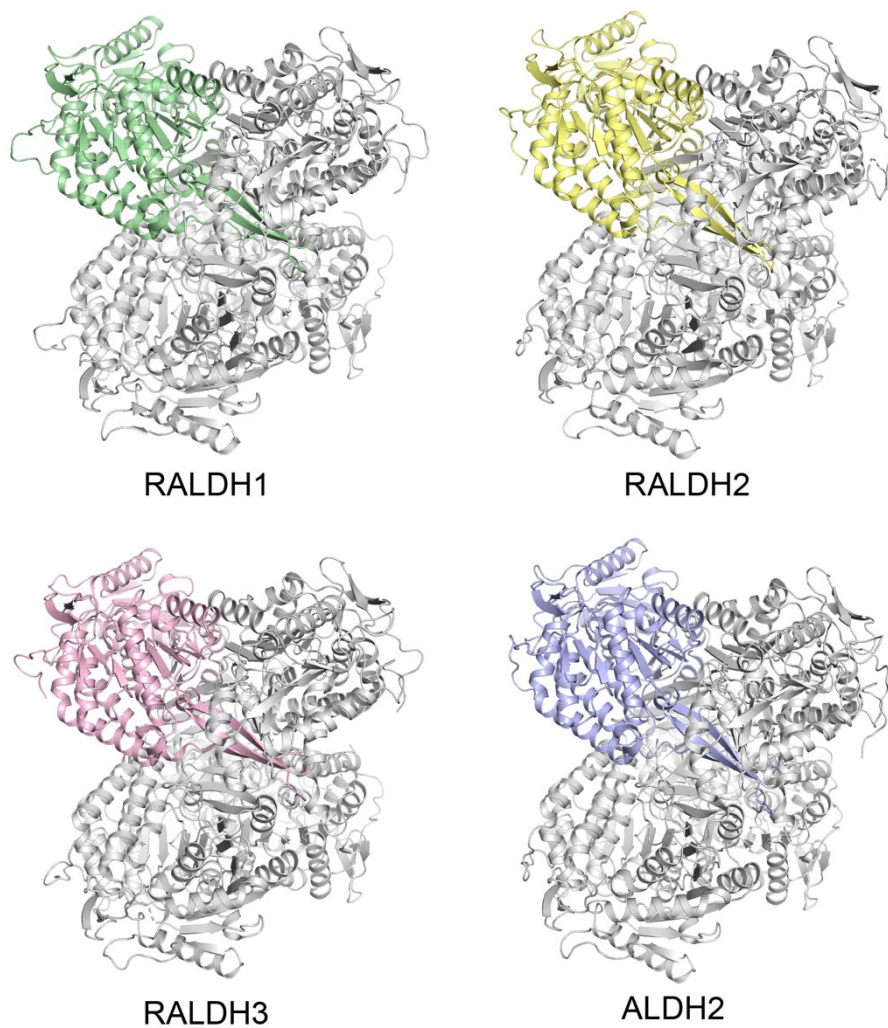

**Figure S2. RALDHs and ALDH2 share highly homologous structures.** Tetrameric structures of RALDH2, RALDH1, RALDH3 and ALDH2 were created based on Protein Data Bank (PDB) code 1BI9, 4WB9, 5FHZ and 1BI9, respectively. One protomer of each tetramer is colored.

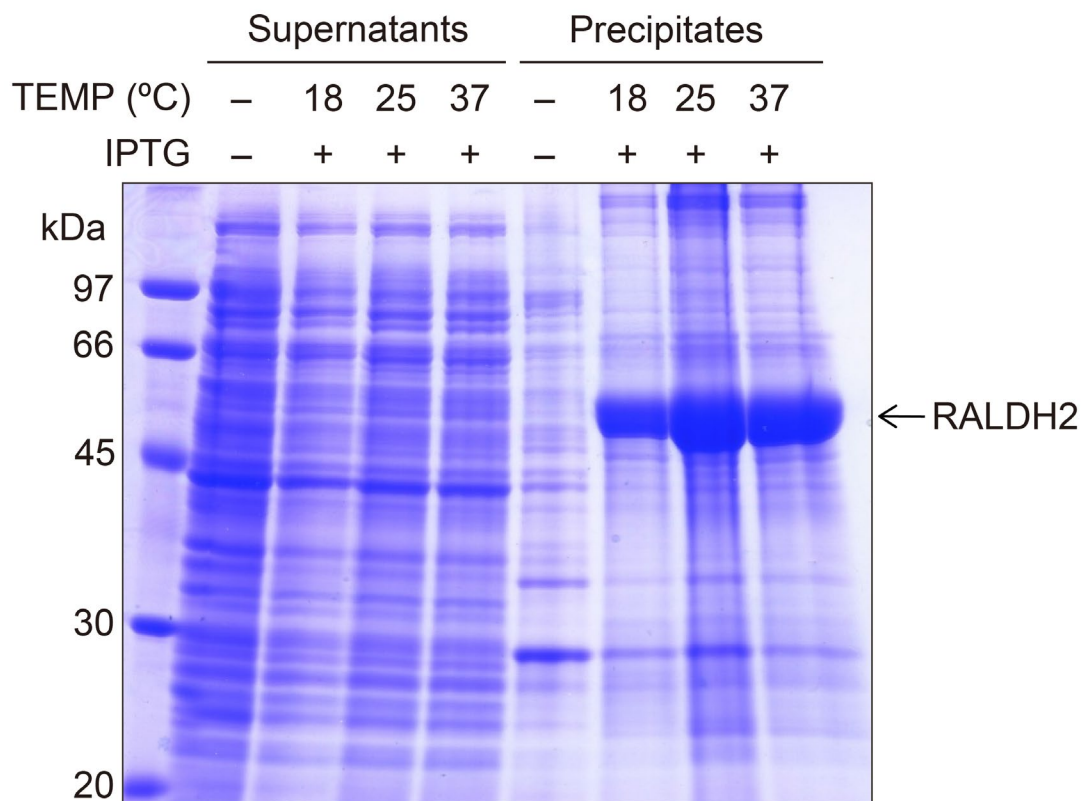

**Figure S3. Coomassie-stained SDS-PAGE analysis for *E. coli* expression of the full-length RALDH2.** The expression was conducted using plasmid pET-47b(+) and host strain Rosetta(DE3) with 0.5 mM IPTG induction at 18 °C overnight, at 25 °C overnight or at 37 °C for 2 h.

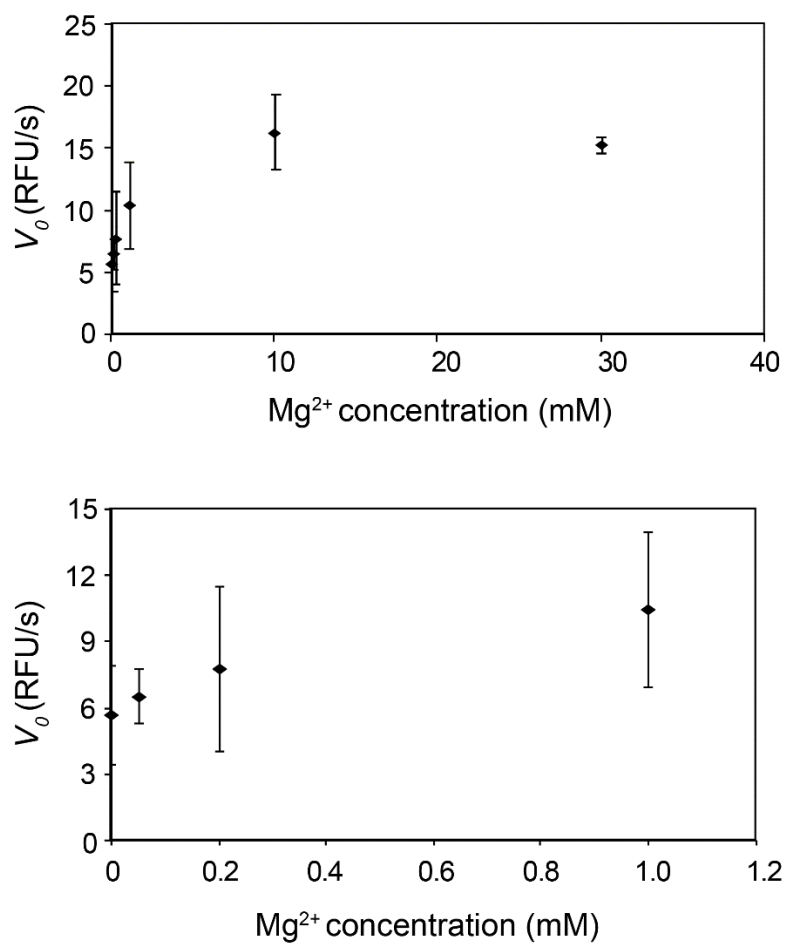

**Figure S4. Effects of  $Mg^{2+}$  ion concentration on the RAL dehydrogenation reactivity of RALDH3.** Upper and lower panels show  $Mg^{2+}$  ion concentration ranges of 0–30 mM and 0–1.0 mM, respectively. Error bars indicate standard deviations of means ( $n = 3$ ).

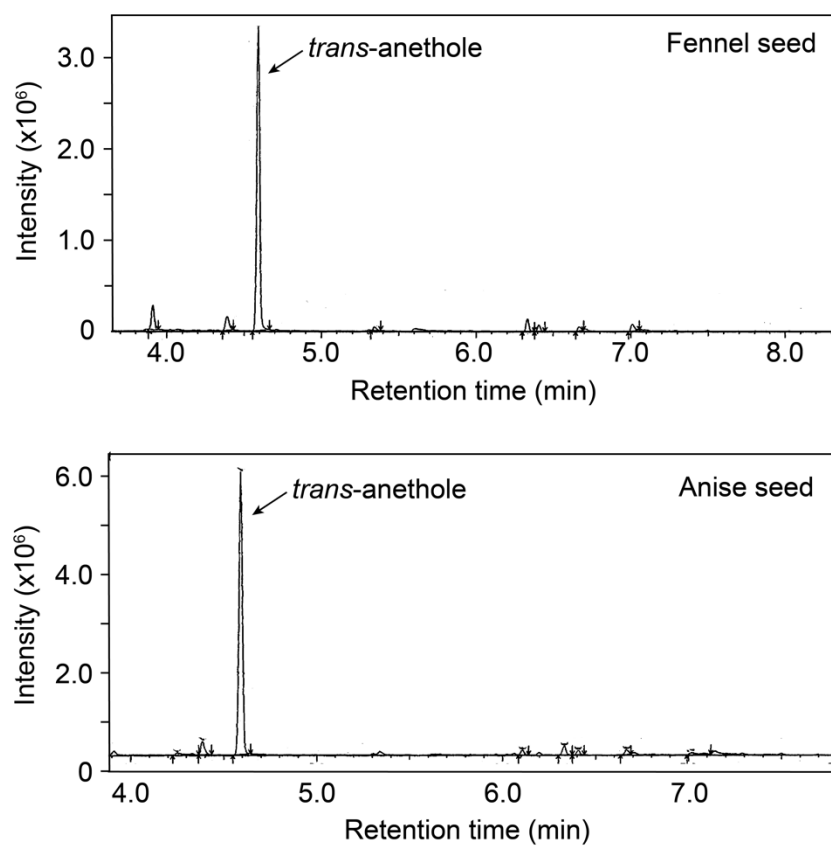

**Figure S5. Total ion chromatograms of the fennel seed (top) and the anise seed (bottom) extracts with their most abundant component *trans*-anethole.**
